# Supplementary material for: Exploring the Oxidative Stress Mechanism of Buyang Huanwu Decoction in Intervention of Vascular Dementia Based on Systems Biology Strategy
Source: Hindawi journal article supplement (doi:10.1155/2021/8879060), 2021-01-01
Supplement: f1 [file 8879060.f1.pdf]

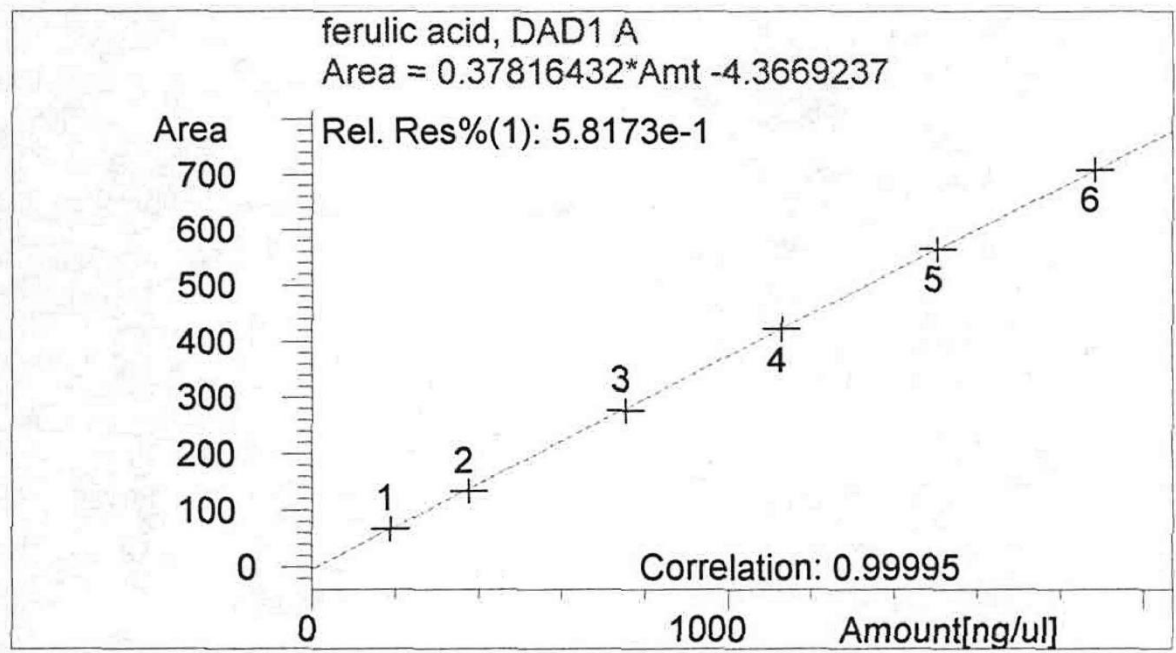

Figure S1 Standard curve of ferulic acid
