# Supplementary material for: Exploring the Oxidative Stress Mechanism of Buyang Huanwu Decoction in Intervention of Vascular Dementia Based on Systems Biology Strategy
Source: Hindawi journal article supplement (doi:10.1155/2021/8879060), 2021-01-01
Supplement: f2 [file 8879060.f2.pdf]

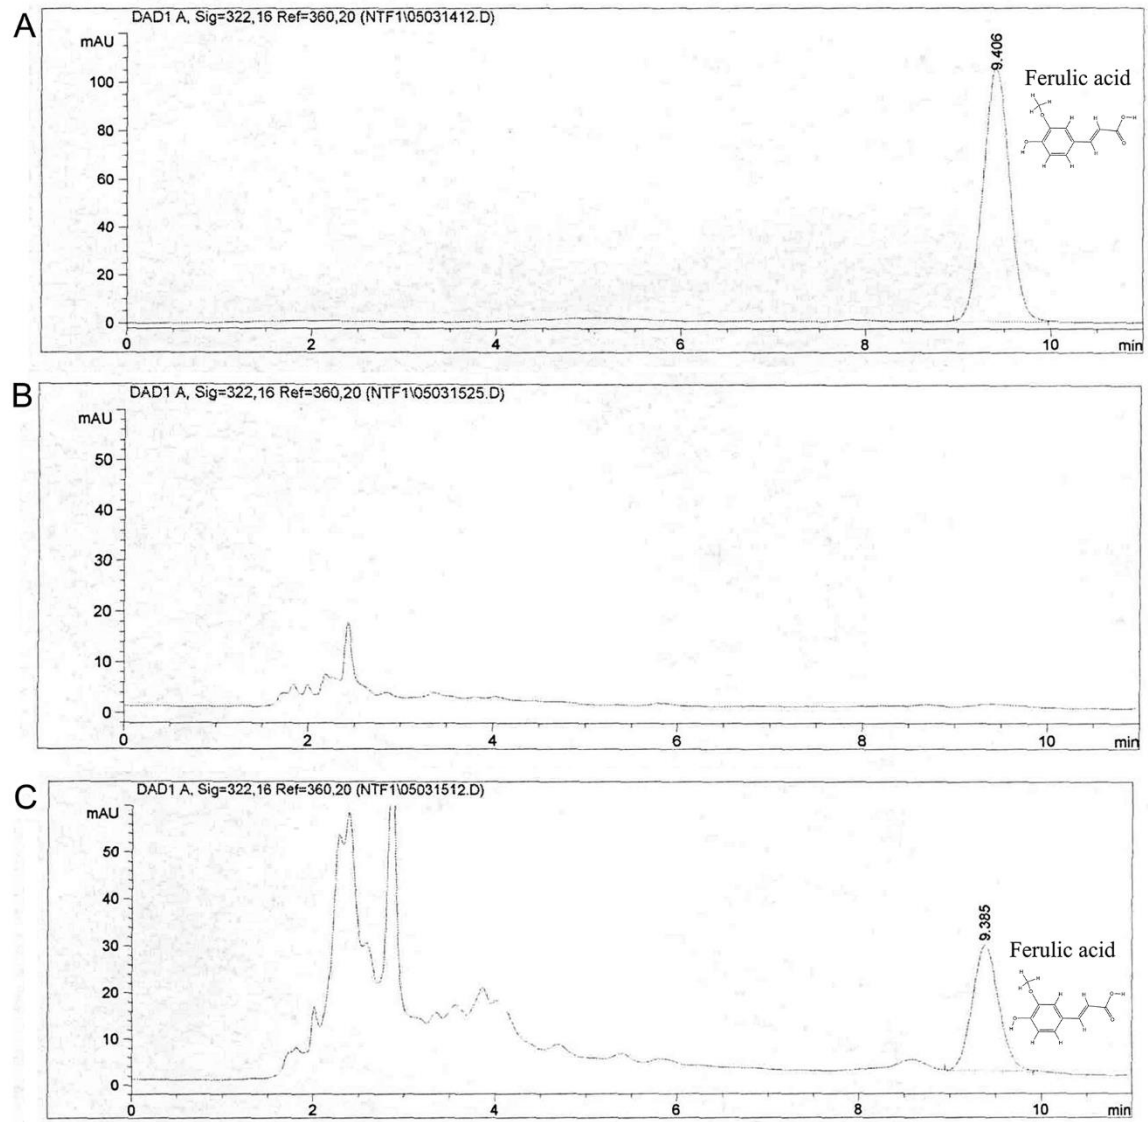

Figure S2 HPLC results (A: Ferulic acid standard; B: Negative control solution; C: MBHD sample)
