# Supplementary material for: Exploring the Oxidative Stress Mechanism of Buyang Huanwu Decoction in Intervention of Vascular Dementia Based on Systems Biology Strategy
Source: Hindawi journal article supplement (doi:10.1155/2021/8879060), 2021-01-01
Supplement: f3 [file 8879060.f3.pdf]

**Table S1 Compound targets of MBHD**

| <b>Compound</b>       | <b>Potential Targets</b> |
|-----------------------|--------------------------|
| 1,7-Dihydroxy-3,9-dir | MAPT                     |
| 1,7-Dihydroxy-3,9-dir | ESR1                     |
| 1,7-Dihydroxy-3,9-dir | ESR2                     |
| 1,7-Dihydroxy-3,9-dir | PLA2G1B                  |
| 1,7-Dihydroxy-3,9-dir | PTPN1                    |
| 1,7-Dihydroxy-3,9-dir | PTPN2                    |
| 1,7-Dihydroxy-3,9-dir | ADORA3                   |
| 1,7-Dihydroxy-3,9-dir | PTGS1                    |
| 1,7-Dihydroxy-3,9-dir | PTGS2                    |
| 1,7-Dihydroxy-3,9-dir | MBNL1                    |
| 1,7-Dihydroxy-3,9-dir | MBNL2                    |
| 1,7-Dihydroxy-3,9-dir | MBNL3                    |
| 1,7-Dihydroxy-3,9-dir | ADORA1                   |
| 1,7-Dihydroxy-3,9-dir | ADORA2A                  |
| 1,7-Dihydroxy-3,9-dir | DYRK1A                   |
| 3,6' -Disinapoyl suc  | PRKCG                    |
| 3,6' -Disinapoyl suc  | PRKCB                    |
| 3,6' -Disinapoyl suc  | PRKCA                    |
| 3,6' -Disinapoyl suc  | PRKCQ                    |
| 3,6' -Disinapoyl suc  | PRKCD                    |
| 3,6' -Disinapoyl suc  | MMP2                     |
| 3,6' -Disinapoyl suc  | MMP9                     |
| 3,6' -Disinapoyl suc  | MMP12                    |
| 3,6' -Disinapoyl suc  | MMP13                    |
| 3,6' -Disinapoyl suc  | MMP1                     |
| 3,6' -Disinapoyl suc  | MMP3                     |
| 3,6' -Disinapoyl suc  | MMP10                    |
| 3,6' -Disinapoyl suc  | MMP27                    |
| 3,6' -Disinapoyl suc  | AKR1B10                  |
| 3,6' -Disinapoyl suc  | AKR1B1                   |
| 3,9-di-O-methylnissol | PTPN1                    |
| 3,9-di-O-methylnissol | PTPN2                    |
| 3,9-di-O-methylnissol | FYN                      |
| 3,9-di-O-methylnissol | YES1                     |
| 3,9-di-O-methylnissol | FGR                      |
| 3,9-di-O-methylnissol | SRC                      |
| 3,9-di-O-methylnissol | FRK                      |
| 3,9-di-O-methylnissol | CRYZ                     |
| 3,9-di-O-methylnissol | ALOX15B                  |
| 3,9-di-O-methylnissol | ALOX5                    |
| 3,9-di-O-methylnissol | ALOX15                   |
| 3,9-di-O-methylnissol | ALOXE3                   |
| 3,9-di-O-methylnissol | CYP19A1                  |
| 3,9-di-O-methylnissol | ALOX12                   |
| 3,9-di-O-methylnissol | ALOX12B                  |
| 4-Guanidino-1-butano  | NOS3                     |

4-Guanidino-1-butano NOS1  
4-Guanidino-1-butano NOS2  
4-Guanidino-1-butano DHPS  
4-Guanidino-1-butano CA1  
4-Guanidino-1-butano CA2  
4-Guanidino-1-butano CA5A  
4-Guanidino-1-butano CA9  
4-Guanidino-1-butano CA5B  
4-Guanidino-1-butano CA3  
4-Guanidino-1-butano CA7  
4-Guanidino-1-butano CA13  
4-Guanidino-1-butano CXCR4  
4-Guanidino-1-butano TDP1  
4-Guanidino-1-butano F2  
64474-51-7 ALOX15B  
64474-51-7 ALOX5  
64474-51-7 ALOX15  
64474-51-7 P18054  
64474-51-7 ALOXE3  
64474-51-7 FLT1  
64474-51-7 FLT4  
64474-51-7 KDR  
64474-51-7 MAPT  
64474-51-7 MET  
64474-51-7 CYP19A1  
64474-51-7 FYN  
64474-51-7 YES1  
64474-51-7 FGR  
64474-51-7 ALOX12  
64474-51-7 ALOX12B  
64997-52-0 AR  
64997-52-0 TDP1  
64997-52-0 CYP19A1  
64997-52-0 HMGCR  
64997-52-0 CYP51A1  
64997-52-0 NR1H2  
64997-52-0 NR1H3  
64997-52-0 LDLR  
64997-52-0 VLDLR  
64997-52-0 LRP8  
64997-52-0 SREBF2  
64997-52-0 SREBF1  
64997-52-0 ESR1  
64997-52-0 ESR2  
64997-52-0 CYP17A1  
7-O-methylisomucron ALOX15B  
7-O-methylisomucron ALOX5  
7-O-methylisomucron ALOX15

7-O-methylisomucron ALOXE3  
7-O-methylisomucron FYN  
7-O-methylisomucron YES1  
7-O-methylisomucron FGR  
7-O-methylisomucron SRC  
7-O-methylisomucron FLT1  
7-O-methylisomucron FLT4  
7-O-methylisomucron KDR  
7-O-methylisomucron FRK  
7-O-methylisomucron MET  
7-O-methylisomucron ALOX12  
7-O-methylisomucron ALOX12B  
73340-41-7 CRYZ  
73340-41-7 PTPN1  
73340-41-7 PTPN2  
73340-41-7 FLT1  
73340-41-7 FLT4  
73340-41-7 KDR  
73340-41-7 CYP19A1  
73340-41-7 MET  
73340-41-7 FGFR1  
73340-41-7 FGFR2  
73340-41-7 FGFR4  
73340-41-7 FGFR3  
73340-41-7 ALOX15B  
73340-41-7 ALOX5  
73340-41-7 ALOX15  
8-Isopentenyl-kaempferol PDE5A  
8-Isopentenyl-kaempferol PDE11A  
8-Isopentenyl-kaempferol CYP19A1  
8-Isopentenyl-kaempferol AKT1  
8-Isopentenyl-kaempferol AKT2  
8-Isopentenyl-kaempferol AKT3  
8-Isopentenyl-kaempferol PTPN1  
8-Isopentenyl-kaempferol PTPN2  
8-Isopentenyl-kaempferol ABCG2  
8-Isopentenyl-kaempferol BACE1  
8-Isopentenyl-kaempferol BACE2  
8-Isopentenyl-kaempferol ALOX5  
8-Isopentenyl-kaempferol ALOX15  
8-Isopentenyl-kaempferol ALOX12  
8-Isopentenyl-kaempferol ALOX15B  
alpha-Asarone CYP19A1  
alpha-Asarone NQO1  
alpha-Asarone NQO2  
alpha-Asarone MAPT  
alpha-Asarone GFER  
alpha-Asarone TUBB1

|                  |         |
|------------------|---------|
| alpha-Asarone    | TUBB8   |
| alpha-Asarone    | MC1R    |
| alpha-Asarone    | PTGS1   |
| alpha-Asarone    | PTGS2   |
| alpha-Asarone    | ESR1    |
| alpha-Asarone    | ESR2    |
| alpha-Asarone    | MAOA    |
| alpha-Asarone    | MAOB    |
| Astragaloside IV | FGF1    |
| Astragaloside IV | FGF2    |
| Astragaloside IV | VEGFA   |
| Astragaloside IV | HPSE    |
| Astragaloside IV | HPSE2   |
| Astragaloside IV | CHRM1   |
| Astragaloside IV | CHRM2   |
| Astragaloside IV | CHRM4   |
| Astragaloside IV | CHRM5   |
| Astragaloside IV | CHRM3   |
| Astragaloside IV | ADRA1D  |
| Astragaloside IV | ADRA1A  |
| Astragaloside IV | ADRA1B  |
| Astragaloside IV | CDK1    |
| Astragaloside IV | CDK4    |
| beta-Asarone     | MAPT    |
| beta-Asarone     | CYP19A1 |
| beta-Asarone     | NQO1    |
| beta-Asarone     | NQO2    |
| beta-Asarone     | TUBB1   |
| beta-Asarone     | TUBB8   |
| beta-Asarone     | GFER    |
| beta-Asarone     | PTGS1   |
| beta-Asarone     | PTGS2   |
| beta-Asarone     | MAOA    |
| beta-Asarone     | MAOB    |
| beta-Asarone     | MC1R    |
| beta-Asarone     | ESR1    |
| beta-Asarone     | ESR2    |
| beta-Sitosterol  | TDP1    |
| beta-Sitosterol  | CYP17A1 |
| beta-Sitosterol  | NR1H2   |
| beta-Sitosterol  | NR1H3   |
| beta-Sitosterol  | HMGCR   |
| beta-Sitosterol  | SREBF2  |
| beta-Sitosterol  | SREBF1  |
| beta-Sitosterol  | AR      |
| beta-Sitosterol  | LDLR    |
| beta-Sitosterol  | VLDLR   |
| beta-Sitosterol  | LRP8    |

|                       |          |
|-----------------------|----------|
| beta-Sitosterol       | SLC6A4   |
| beta-Sitosterol       | BCHE     |
| beta-Sitosterol       | ACHE     |
| beta-Sitosterol       | SLC6A2   |
| Bifendate             | TDP1     |
| Bifendate             | ALOX5    |
| Bifendate             | ALOX15B  |
| Bifendate             | ALOX15   |
| Bifendate             | ALOXE3   |
| Bifendate             | MAPT     |
| Bifendate             | ADORA1   |
| Bifendate             | F10      |
| Bifendate             | F9       |
| Bifendate             | F7       |
| Bifendate             | HSP90AA1 |
| Bifendate             | HSP90AB1 |
| Bifendate             | HSP90B1  |
| Bifendate             | ALOX12   |
| Bifendate             | ALOX12B  |
| Butylidenephthalide   | MBNL1    |
| Butylidenephthalide   | MBNL2    |
| Butylidenephthalide   | MBNL3    |
| Butylidenephthalide   | MAPT     |
| Butylidenephthalide   | CYP19A1  |
| Butylidenephthalide   | LCK      |
| Butylidenephthalide   | LYN      |
| Butylidenephthalide   | HCK      |
| Butylidenephthalide   | BLK      |
| Butylidenephthalide   | PLAU     |
| Butylidenephthalide   | HGFAC    |
| Butylidenephthalide   | ESR1     |
| Butylidenephthalide   | ESR2     |
| Butylidenephthalide   | FLT3     |
| Butylidenephthalide   | STAT3    |
| Calycosin 7-O-glucosi | ALDH2    |
| Calycosin 7-O-glucosi | ALDH1L1  |
| Calycosin 7-O-glucosi | ALDH1A2  |
| Calycosin 7-O-glucosi | ALDH1A1  |
| Calycosin 7-O-glucosi | ALDH1B1  |
| Calycosin 7-O-glucosi | ALDH1A3  |
| Calycosin 7-O-glucosi | ALDH1L2  |
| Calycosin 7-O-glucosi | MBNL1    |
| Calycosin 7-O-glucosi | MBNL2    |
| Calycosin 7-O-glucosi | MBNL3    |
| Calycosin 7-O-glucosi | ADORA1   |
| Calycosin 7-O-glucosi | TDP1     |
| Calycosin 7-O-glucosi | AKR1B1   |
| Calycosin 7-O-glucosi | AKR1B15  |

|                      |         |
|----------------------|---------|
| Calycosin            | MAPT    |
| Calycosin            | HSD17B2 |
| Calycosin            | HSD11B2 |
| Calycosin            | ESR1    |
| Calycosin            | ESR2    |
| Calycosin            | TDP1    |
| Calycosin            | ALOX5   |
| Calycosin            | ALOX15  |
| Calycosin            | ALOX15B |
| Calycosin            | ALOXE3  |
| Calycosin            | ADORA1  |
| Calycosin            | CYP19A1 |
| Calycosin            | EGFR    |
| Calycosin            | ALOX12  |
| Calycosin            | ALOX12B |
| Cholesteryl ferulate | POLB    |
| Cholesteryl ferulate | ELANE   |
| Cholesteryl ferulate | AZU1    |
| Cholesteryl ferulate | PRTN3   |
| Cholesteryl ferulate | MMP1    |
| Cholesteryl ferulate | MMP2    |
| Cholesteryl ferulate | MMP3    |
| Cholesteryl ferulate | MMP9    |
| Cholesteryl ferulate | MMP12   |
| Cholesteryl ferulate | MMP13   |
| Cholesteryl ferulate | MMP10   |
| Cholesteryl ferulate | MMP27   |
| Cholesteryl ferulate | ALOX5   |
| Cholesteryl ferulate | ALOX15  |
| Cholesteryl ferulate | ALOX12  |
| Cycloartenol         | NR1H2   |
| Cycloartenol         | NR1H3   |
| Cycloartenol         | LDLR    |
| Cycloartenol         | VLDLR   |
| Cycloartenol         | LRP8    |
| Cycloartenol         | TDP1    |
| Cycloartenol         | HMGCR   |
| Cycloartenol         | CYP51A1 |
| Cycloartenol         | CYP19A1 |
| Cycloartenol         | SLC6A2  |
| Cycloartenol         | SLC6A4  |
| Cycloartenol         | SLC6A3  |
| Cycloartenol         | SLC6A9  |
| Cycloartenol         | SLC6A7  |
| Cycloartenol         | SLC6A14 |
| Diop                 | MAPT    |
| Diop                 | PRKCG   |
| Diop                 | PRKCB   |

|              |         |
|--------------|---------|
| Diop         | PRKCA   |
| Diop         | PRKCD   |
| Diop         | PRKCO   |
| Diop         | EPHX2   |
| Diop         | PTPN2   |
| Diop         | PTPN1   |
| Diop         | AR      |
| Diop         | MGLL    |
| Diop         | CNR1    |
| Diop         | CNR2    |
| Diop         | BCHE    |
| Diop         | ACHE    |
| Eudesmin     | PTAFR   |
| Eudesmin     | ALOX5   |
| Eudesmin     | ALOX15  |
| Eudesmin     | ALOX12  |
| Eudesmin     | ALOX15B |
| Eudesmin     | ALOX12B |
| Eudesmin     | ALOXE3  |
| Eudesmin     | MAPT    |
| Eudesmin     | MAPK8   |
| Eudesmin     | MAPK9   |
| Eudesmin     | MAPK10  |
| Eudesmin     | MAPK14  |
| Eudesmin     | MAPK11  |
| Eudesmin     | PTGS1   |
| Eudesmin     | PTGS2   |
| Ferulic Acid | CA12    |
| Ferulic Acid | CA1     |
| Ferulic Acid | CA2     |
| Ferulic Acid | CA3     |
| Ferulic Acid | CA6     |
| Ferulic Acid | CA5A    |
| Ferulic Acid | CA7     |
| Ferulic Acid | CA9     |
| Ferulic Acid | CA13    |
| Ferulic Acid | CA14    |
| Ferulic Acid | CA5B    |
| Ferulic Acid | TDP1    |
| Ferulic Acid | AKR1B10 |
| Ferulic Acid | AKR1B1  |
| Ferulic Acid | AKR1B15 |
| Formononetin | MAPT    |
| Formononetin | HSD17B2 |
| Formononetin | HSD11B2 |
| Formononetin | CYP19A1 |
| Formononetin | CBR1    |
| Formononetin | CBR3    |

|              |          |
|--------------|----------|
| Formononetin | ESR1     |
| Formononetin | ESR2     |
| Formononetin | EGFR     |
| Formononetin | ERBB2    |
| Formononetin | ERBB3    |
| Formononetin | ERBB4    |
| Formononetin | TDP1     |
| Formononetin | HSD17B1  |
| Formononetin | RDH8     |
| Guanosine    | NOS3     |
| Guanosine    | NOS1     |
| Guanosine    | NOS2     |
| Guanosine    | DHFR     |
| Guanosine    | DHFRL1   |
| Guanosine    | ADK      |
| Guanosine    | MAPT     |
| Guanosine    | GRM5     |
| Guanosine    | APP      |
| Guanosine    | BACE1    |
| Guanosine    | BACE2    |
| Guanosine    | APLP2    |
| Guanosine    | PIK3CA   |
| Guanosine    | PIK3CG   |
| Guanosine    | PIK3CD   |
| Hederagenin  | PTPN2    |
| Hederagenin  | PTPN1    |
| Hederagenin  | AKR1B10  |
| Hederagenin  | AKR1B15  |
| Hederagenin  | AKR1A1   |
| Hederagenin  | AKR1B1   |
| Hederagenin  | PLA2G1B  |
| Hederagenin  | POLB     |
| Hederagenin  | PTPRF    |
| Hederagenin  | ACP1     |
| Hederagenin  | HSD11B1  |
| Hederagenin  | PTPRD    |
| Hederagenin  | PTPRS    |
| Hederagenin  | HSD11B1L |
| Hederagenin  | AKR1E2   |
| Hyrcanoside  | MAPT     |
| Hyrcanoside  | STAT3    |
| Hyrcanoside  | STAT1    |
| Hyrcanoside  | STAT2    |
| Hyrcanoside  | STAT4    |
| Hyrcanoside  | ADORA3   |
| Hyrcanoside  | PRKCG    |
| Hyrcanoside  | PRKCB    |
| Hyrcanoside  | PRKCA    |



|              |         |
|--------------|---------|
| Hyrcanoside  | PRKCQ   |
| Hyrcanoside  | PRKCD   |
| Hyrcanoside  | SLC6A9  |
| Hyrcanoside  | SLC6A7  |
| Hyrcanoside  | SLC6A14 |
| Hyrcanoside  | SLC6A5  |
| Isoflavanone | ALOX15B |
| Isoflavanone | ALOX5   |
| Isoflavanone | ALOX15  |
| Isoflavanone | P18054  |
| Isoflavanone | ALOXE3  |
| Isoflavanone | CYP19A1 |
| Isoflavanone | FLT1    |
| Isoflavanone | FLT4    |
| Isoflavanone | KDR     |
| Isoflavanone | ESR1    |
| Isoflavanone | ESR2    |
| Isoflavanone | MET     |
| Isoflavanone | MAPT    |
| Isoflavanone | TDP1    |
| Isorhamnetin | CYP1A2  |
| Isorhamnetin | XDH     |
| Isorhamnetin | CYP1B1  |
| Isorhamnetin | CYP1A1  |
| Isorhamnetin | AOX1    |
| Isorhamnetin | MAPT    |
| Isorhamnetin | AKR1B1  |
| Isorhamnetin | AKR1B15 |
| Isorhamnetin | AKR1B10 |
| Isorhamnetin | NOX4    |
| Isorhamnetin | AKR1A1  |
| Isorhamnetin | ABCC1   |
| Isorhamnetin | ABCC3   |
| Isorhamnetin | ABCC2   |
| Isorhamnetin | AKR1E2  |
| Jaranol      | ADORA1  |
| Jaranol      | ADORA3  |
| Jaranol      | DYRK1A  |
| Jaranol      | ABCG2   |
| Jaranol      | MAPT    |
| Jaranol      | PLG     |
| Jaranol      | NOX4    |
| Jaranol      | LPA     |
| Jaranol      | ADORA2A |
| Jaranol      | AKR1B10 |
| Jaranol      | AKR1B1  |
| Jaranol      | AKR1B15 |
| Jaranol      | MCL1    |

|                |         |
|----------------|---------|
| Jaranol        | ALOX5   |
| Jaranol        | ALOX15  |
| Kaempferol     | CYP1A2  |
| Kaempferol     | ABCB1   |
| Kaempferol     | ALOX5   |
| Kaempferol     | HSD17B1 |
| Kaempferol     | AKR1B1  |
| Kaempferol     | ALOX15  |
| Kaempferol     | ABCC1   |
| Kaempferol     | AHR     |
| Kaempferol     | HSD17B2 |
| Kaempferol     | XDH     |
| Kaempferol     | DYRK1A  |
| Kaempferol     | CYP1B1  |
| Kaempferol     | NOX4    |
| Kaempferol     | TDP1    |
| Kaempferol     | ALOX12  |
| Ligustilide    | ALOX5   |
| Ligustilide    | ALOX15  |
| Ligustilide    | ALOX15B |
| Ligustilide    | ALOXE3  |
| Ligustilide    | SLC6A2  |
| Ligustilide    | SLC6A4  |
| Ligustilide    | SLC6A3  |
| Ligustilide    | SLC6A9  |
| Ligustilide    | SLC6A7  |
| Ligustilide    | SLC6A14 |
| Ligustilide    | SLC6A5  |
| Ligustilide    | TDP1    |
| Ligustilide    | ALOX12  |
| Ligustilide    | ALOX12B |
| Ligustilide    | CYP17A1 |
| Liquiritigenin | MAPT    |
| Liquiritigenin | MAOA    |
| Liquiritigenin | MAOB    |
| Liquiritigenin | CYP19A1 |
| Liquiritigenin | TDP1    |
| Liquiritigenin | HSD17B1 |
| Liquiritigenin | RDH8    |
| Liquiritigenin | ABCG2   |
| Liquiritigenin | CYP1A2  |
| Liquiritigenin | CBR1    |
| Liquiritigenin | CYP1B1  |
| Liquiritigenin | CYP1A1  |
| Liquiritigenin | CBR3    |
| Liquiritigenin | ESR1    |
| Liquiritigenin | ESR2    |
| Mairin         | AKR1B10 |

|            |          |
|------------|----------|
| Mairin     | POLB     |
| Mairin     | AKR1B1   |
| Mairin     | AKR1B15  |
| Mairin     | AKR1A1   |
| Mairin     | UBA2     |
| Mairin     | SAE1     |
| Mairin     | MAPT     |
| Mairin     | HSD11B1  |
| Mairin     | HSD11B1L |
| Mairin     | NR1H4    |
| Mairin     | CDC25A   |
| Mairin     | CDC25B   |
| Mairin     | TOP2A    |
| Mairin     | TOP2B    |
| Mairin     | AKR1E2   |
| Mandenol   | FAAH     |
| Mandenol   | CNR1     |
| Mandenol   | CNR2     |
| Mandenol   | TDP1     |
| Mandenol   | ALOX5    |
| Mandenol   | ALOX15   |
| Mandenol   | ALOX15B  |
| Mandenol   | P18054   |
| Mandenol   | ALOXE3   |
| Mandenol   | PTPN2    |
| Mandenol   | PTPN1    |
| Mandenol   | PPARG    |
| Mandenol   | PPARD    |
| Mandenol   | ALOX12B  |
| Mandenol   | ALOX12   |
| Mandenol   | CYP17A1  |
| Myricanone | TDP1     |
| Myricanone | CNR1     |
| Myricanone | CNR2     |
| Myricanone | ALOX15   |
| Myricanone | ALOX12   |
| Myricanone | ALOX5    |
| Myricanone | ALOX15B  |
| Myricanone | ALOX12B  |
| Myricanone | ALOXE3   |
| Myricanone | HTR1A    |
| Myricanone | HTR1B    |
| Myricanone | MAPT     |
| Myricanone | HSD17B1  |
| Myricanone | RDH8     |
| Myricanone | MBNL1    |
| Ononin     | ALDH2    |
| Ononin     | ALDH1L1  |

|                      |         |
|----------------------|---------|
| Ononin               | ALDH1A2 |
| Ononin               | ALDH1A1 |
| Ononin               | ALDH1B1 |
| Ononin               | ALDH1A3 |
| Ononin               | ALDH1L2 |
| Ononin               | MBNL1   |
| Ononin               | MBNL2   |
| Ononin               | MBNL3   |
| Ononin               | IL5     |
| Ononin               | CA12    |
| Ononin               | CA1     |
| Ononin               | CA2     |
| Perlolyrine          | GRM5    |
| Perlolyrine          | GRM1    |
| Perlolyrine          | MAPT    |
| Perlolyrine          | PDE4A   |
| Perlolyrine          | PDE4B   |
| Perlolyrine          | PDE4C   |
| Perlolyrine          | PDE4D   |
| Perlolyrine          | ESR1    |
| Perlolyrine          | ESR2    |
| Perlolyrine          | EGFR    |
| Perlolyrine          | ERBB2   |
| Perlolyrine          | ERBB3   |
| Perlolyrine          | ERBB4   |
| Perlolyrine          | ADK     |
| Perlolyrine          | ADORA2A |
| Polygalasaponin XXV  | F2      |
| Polygalasaponin XXV  | GLI1    |
| Polygalasaponin XXV  | GLI2    |
| Polygalasaponin XXV  | GLI3    |
| Polygalasaponin XXV  | MAPT    |
| Polygalasaponin XXV  | BCL2L1  |
| Polygalasaponin XXV  | BCL2    |
| Polygalasaponin XXV  | BCL2L2  |
| Polygalasaponin XXV  | PPP1CC  |
| Polygalasaponin XXV  | PPP1CA  |
| Polygalasaponin XXV  | PPP1CB  |
| Polygalasaponin XXV  | PTAFR   |
| Polygalasaponin XXV  | JUN     |
| Polygalasaponin XXV  | JUNB    |
| Polygalasaponin XXV  | JUND    |
| Polygalaxanthone III | MAPT    |
| Polygalaxanthone III | MBNL1   |
| Polygalaxanthone III | MBNL2   |
| Polygalaxanthone III | MBNL3   |
| Polygalaxanthone III | TDP1    |
| Polygalaxanthone III | XDH     |

|                      |         |
|----------------------|---------|
| Polygalaxanthone III | AOX1    |
| Polygalaxanthone III | AKR1B10 |
| Polygalaxanthone III | AKR1B1  |
| Polygalaxanthone III | AKR1B15 |
| Polygalaxanthone III | DYRK1A  |
| Polygalaxanthone III | ADORA1  |
| Polygalaxanthone III | CA12    |
| Polygalaxanthone III | CA1     |
| Polygalaxanthone III | CA2     |
| Quercetin            | CA12    |
| Quercetin            | EGFR    |
| Quercetin            | CA1     |
| Quercetin            | CA2     |
| Quercetin            | PLA2G1B |
| Quercetin            | ERBB2   |
| Quercetin            | MPO     |
| Quercetin            | CYP1A2  |
| Quercetin            | CDK1    |
| Quercetin            | CA3     |
| Quercetin            | PRSS1   |
| Quercetin            | MMP2    |
| Quercetin            | MMP3    |
| Quercetin            | ALOX5   |
| Quercetin            | MAPT    |
| Senegin III          | PRKCQ   |
| Senegin III          | PRKCD   |
| Senegin III          | FDFT1   |
| Senegin III          | F2      |
| Senegin III          | PRKCG   |
| Senegin III          | PRKCB   |
| Senegin III          | PRKCA   |
| Senegin III          | MMP2    |
| Senegin III          | MMP9    |
| Senegin III          | MMP12   |
| Senegin III          | MMP13   |
| Senegin III          | MMP1    |
| Senegin III          | MMP3    |
| Senegin III          | MMP10   |
| Senegin III          | MMP27   |
| senkyunolide I       | CRYZ    |
| senkyunolide I       | PRKCG   |
| senkyunolide I       | PRKCB   |
| senkyunolide I       | PRKCA   |
| senkyunolide I       | PRKCQ   |
| senkyunolide I       | PRKCD   |
| senkyunolide I       | PTGS1   |
| senkyunolide I       | PTGS2   |
| senkyunolide I       | RELA    |

|                    |         |
|--------------------|---------|
| senkyunolide I     | REL     |
| senkyunolide I     | MMP1    |
| senkyunolide I     | MMP3    |
| senkyunolide I     | MMP8    |
| senkyunolide I     | MMP12   |
| senkyunolide I     | MMP13   |
| Senkyunone         | ALOX5   |
| Senkyunone         | ALOX15  |
| Senkyunone         | ALOX15B |
| Senkyunone         | ALOX12B |
| Senkyunone         | ALOX12  |
| Senkyunone         | ALOXE3  |
| Senkyunone         | CYP19A1 |
| Senkyunone         | NR3C1   |
| Senkyunone         | NR3C2   |
| Senkyunone         | MAPT    |
| Senkyunone         | BCHE    |
| Senkyunone         | ACHE    |
| Senkyunone         | TDP1    |
| Senkyunone         | ESR1    |
| Senkyunone         | ESR2    |
| Sibiricaxanthone A | MAPT    |
| Sibiricaxanthone A | MBNL1   |
| Sibiricaxanthone A | MBNL2   |
| Sibiricaxanthone A | MBNL3   |
| Sibiricaxanthone A | TDP1    |
| Sibiricaxanthone A | DYRK1A  |
| Sibiricaxanthone A | CA12    |
| Sibiricaxanthone A | CA1     |
| Sibiricaxanthone A | CA2     |
| Sibiricaxanthone A | CA3     |
| Sibiricaxanthone A | CA7     |
| Sibiricaxanthone A | CA9     |
| Sibiricaxanthone A | CA13    |
| Sibiricaxanthone A | CA14    |
| Sibiricaxanthone A | CA5B    |
| Sitosterol         | TDP1    |
| Sitosterol         | AR      |
| Sitosterol         | HMGCR   |
| Sitosterol         | CYP51A1 |
| Sitosterol         | NR1H2   |
| Sitosterol         | NR1H3   |
| Sitosterol         | CYP19A1 |
| Sitosterol         | CYP17A1 |
| Sitosterol         | LDLR    |
| Sitosterol         | VLDLR   |
| Sitosterol         | LRP8    |
| Sitosterol         | ESR1    |

|                |          |
|----------------|----------|
| Sitosterol     | ESR2     |
| Sitosterol     | SLC6A2   |
| Sitosterol     | SLC6A4   |
| Stigmasterol   | AR       |
| Stigmasterol   | TDP1     |
| Stigmasterol   | CYP19A1  |
| Stigmasterol   | HMGCR    |
| Stigmasterol   | CYP51A1  |
| Stigmasterol   | NR1H2    |
| Stigmasterol   | NR1H3    |
| Stigmasterol   | LDLR     |
| Stigmasterol   | VLDLR    |
| Stigmasterol   | LRP8     |
| Stigmasterol   | CYP17A1  |
| Stigmasterol   | ESR1     |
| Stigmasterol   | ESR2     |
| Stigmasterol   | SLC6A2   |
| Stigmasterol   | SLC6A3   |
| Tenuifolin     | BCL2L1   |
| Tenuifolin     | BCL2     |
| Tenuifolin     | BCL2L2   |
| Tenuifolin     | STAT3    |
| Tenuifolin     | STAT1    |
| Tenuifolin     | STAT2    |
| Tenuifolin     | STAT4    |
| Tenuifolin     | F2       |
| Tenuifolin     | NR3C1    |
| Tenuifolin     | NR3C2    |
| Tenuifolin     | HSD11B1  |
| Tenuifolin     | HSD11B2  |
| Tenuifolin     | HSD11B1L |
| Tenuifolin     | MMP2     |
| Tenuifolin     | MMP9     |
| Tenuifoliose A | MMP1     |
| Tenuifoliose A | PRKCG    |
| Tenuifoliose A | PRKCB    |
| Tenuifoliose A | MMP2     |
| Tenuifoliose A | MMP3     |
| Tenuifoliose A | MMP9     |
| Tenuifoliose A | PRKCA    |
| Tenuifoliose A | MMP12    |
| Tenuifoliose A | MMP13    |
| Tenuifoliose A | PRKCQ    |
| Tenuifoliose A | PRKCD    |
| Tenuifoliose A | MMP10    |
| Tenuifoliose A | MMP27    |
| Tenuifoliose A | ABCB1    |
| Tenuifoliose A | ABCB11   |

|                 |         |
|-----------------|---------|
| Tenuifoliose H  | ABCB1   |
| Tenuifoliose H  | ABCB11  |
| Tenuifoliose H  | ABCB4   |
| Tenuifoliose H  | ABCB5   |
| Tenuifoliose H  | SQLE    |
| Tenuifoliose H  | PTPN2   |
| Tenuifoliose H  | PTPN1   |
| Tenuifoliose H  | PRKCG   |
| Tenuifoliose H  | PRKCB   |
| Tenuifoliose H  | MMP2    |
| Tenuifoliose H  | MMP9    |
| Tenuifoliose H  | PRKCA   |
| Tenuifoliose H  | MMP12   |
| Tenuifoliose H  | MMP13   |
| Tenuifoliose H  | PRKCC   |
| Tenuifoliose I  | ABCB1   |
| Tenuifoliose I  | ABCB11  |
| Tenuifoliose I  | ABCB4   |
| Tenuifoliose I  | ABCB5   |
| Tenuifoliose I  | PRKCG   |
| Tenuifoliose I  | PRKCB   |
| Tenuifoliose I  | MMP2    |
| Tenuifoliose I  | MMP9    |
| Tenuifoliose I  | PRKCA   |
| Tenuifoliose I  | MMP12   |
| Tenuifoliose I  | MMP13   |
| Tenuifoliose I  | PRKCC   |
| Tenuifoliose I  | PRKCD   |
| Tenuifoliose I  | MMP1    |
| Tenuifoliose I  | MMP3    |
| Tenuifoliside A | SQLE    |
| Tenuifoliside A | ABCB1   |
| Tenuifoliside A | ABCB11  |
| Tenuifoliside A | ABCB4   |
| Tenuifoliside A | ABCB5   |
| Tenuifoliside A | LGALS9  |
| Tenuifoliside A | LGALS3  |
| Tenuifoliside A | LGALS9B |
| Tenuifoliside A | LGALS9C |
| Tenuifoliside A | MMP1    |
| Tenuifoliside A | PRKCG   |
| Tenuifoliside A | PRKCB   |
| Tenuifoliside A | MMP2    |
| Tenuifoliside A | MMP3    |
| Tenuifoliside A | MMP9    |
| Tenuifoliside B | PRKCG   |
| Tenuifoliside B | PRKCB   |
| Tenuifoliside B | PRKCA   |



|                |          |
|----------------|----------|
| Tenuifolside B | PRKCQ    |
| Tenuifolside B | PRKCD    |
| Tenuifolside B | MMP1     |
| Tenuifolside B | MMP2     |
| Tenuifolside B | MMP3     |
| Tenuifolside B | MMP9     |
| Tenuifolside B | MMP12    |
| Tenuifolside B | MMP13    |
| Tenuifolside B | MMP10    |
| Tenuifolside B | MMP27    |
| Tenuifolside B | TDP1     |
| Tenuifolside B | ABCB1    |
| Wallichilide   | TDP1     |
| Wallichilide   | PPARG    |
| Wallichilide   | PPARD    |
| Wallichilide   | PPARA    |
| Wallichilide   | MAPT     |
| Wallichilide   | ADORA1   |
| Wallichilide   | JUN      |
| Wallichilide   | JUNB     |
| Wallichilide   | JUND     |
| Wallichilide   | CYP19A1  |
| Wallichilide   | PTAFR    |
| Wallichilide   | FNTA     |
| Wallichilide   | HSD11B1  |
| Wallichilide   | HSD11B1L |
| Wallichilide   | DUSP3    |
| Wallichilide   | FNTB     |
| Xanthinin      | PTGS1    |
| Xanthinin      | PTGS2    |
| Xanthinin      | MAPT     |
| Xanthinin      | FNTA     |
| Xanthinin      | CYP19A1  |
| Xanthinin      | PRKCG    |
| Xanthinin      | PRKCB    |
| Xanthinin      | PRKCA    |
| Xanthinin      | PRKCQ    |
| Xanthinin      | PRKCD    |
| Xanthinin      | RELA     |
| Xanthinin      | REL      |
| Xanthinin      | TLR9     |
| Xanthinin      | FNTB     |
| Xanthinin      | PTPN2    |
