# Supplementary material for: Exploring the Oxidative Stress Mechanism of Buyang Huanwu Decoction in Intervention of Vascular Dementia Based on Systems Biology Strategy
Source: Hindawi journal article supplement (doi:10.1155/2021/8879060), 2021-01-01
Supplement: f4 [file 8879060.f4.pdf]

## Table S2 VD Gene

MAPT

APP

APOE

PSEN1

ACE

TNF

ACHE

BCHE

SORL1

RETREG1

MTHFR

CHAT

NOTCH3

VEGFA

PLAU

NOS3

BLMH

SERPINA3

MPO

A2M

HFE

APBB2

PAXIP1

MT-ND1

MIR34A

MIR146A

MIR106B

MIR29A

MIR107

MIR29B1

MIR328

MIR298

AD5

AD10

AD6

AD7

AD11

AD12

AD13

AD14

AD15

AD16

AD17

AD8

PON1

CST3

PRNP

CRH  
MBP  
SOD1  
IL1A  
AGER  
GFAP  
SLC6A4  
CTSD  
GRIN1  
GRIN2A  
CAT  
CASP3  
GRIN2B  
CHRNA4  
COX5A  
SNCA  
BDNF  
ITM2B  
NGF  
PSEN2  
GRN  
SYP  
LTA  
SQSTM1  
TARDBP  
BACE1  
SNCB  
IL1B  
MAOB  
IDE  
CYP46A1  
HMOX1  
LRP1  
S100B  
CHRNA7  
SNCG  
HTR2A  
ADAM17  
TNFRSF1A  
TF  
CD40  
VLDLR  
CLU  
DNM1L  
GAL  
VIP  
REG1A  
MT3

MIR210  
PPARG  
CASP8  
NTRK2  
ADAM10  
MAPK1  
CDK5  
UCHL1  
PPP3CA  
CSNK1D  
GSK3B  
CASP7  
FAS  
LPL  
MME  
LDLR  
CTSB  
TTR  
SLC1A2  
SLC1A3  
ITPR1  
CYCS  
MAPK3  
MAPK8  
NQO1  
DYRK1A  
PTGS2  
GDNF  
ABCA1  
GSK3A  
CASP9  
CASP2  
CAPN1  
NOS1  
CREB1  
NTRK1  
APAF1  
PLCB1  
GAPDH  
CAPN2  
ITPR3  
EIF2AK3  
NCSTN  
FPR2  
MSR1  
ERN1  
GLRX  
HSD17B10

CDK5R1  
DPYSL2  
DKK1  
SEMA3A  
EIF2AK2  
TNFRSF21  
PIN1  
RTN4  
NGFR  
PSENEN  
GRIN2C  
CALM2  
DHCR24  
DLG4  
SLC18A3  
OLR1  
UBB  
ABCA7  
GPC1  
APH1B  
APBB1  
HTR6  
RELN  
CALM3  
RCAN1  
MAP2  
DLST  
TMED10  
OGT  
APH1A  
APLP2  
APBA2  
LRP8  
MARK4  
COX4I1  
CALCA  
CALM1  
MAP1B  
PICALM  
UBQLN1  
KLK8  
GAP43  
RYR3  
RTN3  
NAE1  
VSNL1  
PADI2  
BACE2

APLP1  
APOC1  
CIB1  
PLD3  
AATF  
MARK1  
DOCK3  
CTNNA3  
VPS26A  
TFCP2  
BPTF  
APBA3  
ANKS1B  
COL25A1  
CLSTN1  
DBN1  
NRGN  
STMN2  
SLC39A1  
GPR3  
PITRM1  
APBA1  
KCNIP3  
MEOX2  
CALML5  
NDRG2  
SLC30A6  
FRMD4A  
DNMBP  
APBB3  
SORCS3  
TTBK1  
GRK2  
PCSK1N  
CALHM1  
DCHS2  
EXOC3L2  
PTPA  
GSAP  
TM2D1  
MT-CO1  
MT-ND2  
MT-CO2  
ATP5PD  
STH  
MALRD1  
ASAH2B  
MIAT

MIR181C  
MIR26B  
SOX2-OT  
HAR1A  
MIR320A  
CDKN2B-AS1  
MIR93  
MIR128-1  
MIR22  
MIRLET7I  
MIR197  
BCYRN1  
HAR1B  
MIR15A  
MIR363  
MIR511  
SNHG3  
LINC01080  
BACE1-AS  
LRP1-AS  
LINC01772  
LINC01616  
CHGA  
SERPINI1  
SST  
HTRA1  
ITIH4  
IL6  
SYK  
DNMT1  
SLC6A3  
TBK1  
VCP  
LRRK2  
GBA  
NPC1  
HNRNPA1  
ARSA  
PARK7  
CSTB  
HNRNPA2B1  
TRPM7  
FUS  
CHMP2B  
TYROBP  
UBQLN2  
TREM2  
ACTC1

PLP1  
SNCAIP  
NPC2  
ATP13A2  
C9orf72  
CHCHD10  
NHLRC1  
RECK  
PRKN  
TMEM106B  
TGFB1  
AGT  
SREBF2  
MMP9  
ICAM1  
PLA2G2A  
ESR2  
NPPB  
SERPINE1  
APOB  
APOH  
AGTR1  
MSBP2  
VWF  
PTH  
ADIPOQ  
NEFL  
TNFSF14  
CBS  
IGF1  
DCX  
FABP3  
GSTO1  
AMBP  
KLK6  
BCR  
MMP1  
MMP3  
LBR  
CP  
ECE1  
NPY  
CHRM1  
AOC3  
CDKN2A-DT  
ESR1  
DNM1  
APOA1

CLDN1  
HTR1A  
ATP1B1  
CETP  
AVP  
ADORA2A  
OCLN  
TIMP1  
SLC19A1  
PON3  
LCN2  
CHRN2  
KLK1  
CSF2  
SAR1B  
LIF  
PON2  
ANGPT4  
TNFRSF19  
RPGRIP1L  
TSC22D3  
PHLDB2  
LOC110806262  
SDHB  
PDE4A
