# Supplementary material for: Exploring the Oxidative Stress Mechanism of Buyang Huanwu Decoction in Intervention of Vascular Dementia Based on Systems Biology Strategy
Source: Hindawi journal article supplement (doi:10.1155/2021/8879060), 2021-01-01
Supplement: f5 [file 8879060.f5.pdf]

**Table S3 Biological Processes of MBHD-VD PPI Network**

| Cluster    | Term       | Pathway                                  | Count                                    | %        | Pvalue   |          |
|------------|------------|------------------------------------------|------------------------------------------|----------|----------|----------|
| 1          | GO:0010628 | positive regulation of gene expression   | 16                                       | 23.52941 | 8.88E-14 |          |
|            | GO:0043066 | negative regulation of apoptotic proce   | 19                                       | 27.94118 | 1.23E-13 |          |
|            | GO:0045429 | positive regulation of nitric oxide bios | 9                                        | 13.23529 | 5.42E-12 |          |
|            | GO:0050999 | regulation of nitric-oxide synthase act  | 8                                        | 11.76471 | 7.23E-12 |          |
|            | GO:0002576 | platelet degranulation                   | 11                                       | 16.17647 | 8.95E-12 |          |
|            | GO:0048661 | positive regulation of smooth muscle c   | 9                                        | 13.23529 | 9.06E-11 |          |
|            | GO:0051092 | positive regulation of NF-kappaB tran    | 11                                       | 16.17647 | 1.17E-10 |          |
|            | GO:0006954 | inflammatory response                    | 15                                       | 22.05882 | 2.32E-10 |          |
|            | GO:0030168 | platelet activation                      | 9                                        | 13.23529 | 1.76E-08 |          |
|            | GO:0001525 | angiogenesis                             | 11                                       | 16.17647 | 1.79E-08 |          |
|            | GO:0051000 | positive regulation of nitric-oxide syn  | 6                                        | 8.823529 | 2.17E-08 |          |
|            | GO:0014066 | regulation of phosphatidylinositol 3-k   | 8                                        | 11.76471 | 2.47E-08 |          |
|            | GO:0032355 | response to estradiol                    | 8                                        | 11.76471 | 7.25E-08 |          |
|            | GO:0001666 | response to hypoxia                      | 9                                        | 13.23529 | 4.01E-07 |          |
|            | GO:0048010 | vascular endothelial growth factor rec   | 7                                        | 10.29412 | 4.08E-07 |          |
|            | GO:1901215 | negative regulation of neuron death      | 6                                        | 8.823529 | 5.13E-07 |          |
|            | GO:0043536 | positive regulation of blood vessel enc  | 5                                        | 7.352941 | 8.58E-07 |          |
|            | GO:0043524 | negative regulation of neuron apoptoti   | 8                                        | 11.76471 | 9.29E-07 |          |
|            | GO:0035924 | cellular response to vascular endothel   | 5                                        | 7.352941 | 1.94E-06 |          |
|            | GO:0034097 | response to cytokine                     | 6                                        | 8.823529 | 1.95E-06 |          |
|            | GO:0045766 | positive regulation of angiogenesis      | 7                                        | 10.29412 | 6.43E-06 |          |
|            | GO:0030949 | positive regulation of vascular endoth   | 4                                        | 5.882353 | 3.28E-05 |          |
|            | GO:0043123 | positive regulation of I-kappaB kinase   | 7                                        | 10.29412 | 4.36E-05 |          |
|            | GO:0042346 | positive regulation of NF-kappaB imp     | 4                                        | 5.882353 | 7.67E-05 |          |
|            | GO:0051402 | neuron apoptotic process                 | 4                                        | 5.882353 | 3.04E-04 |          |
|            | GO:0010507 | negative regulation of autophagy         | 4                                        | 5.882353 | 3.95E-04 |          |
|            | GO:0006979 | response to oxidative stress             | 5                                        | 7.352941 | 9.73E-04 |          |
|            | GO:0030593 | neutrophil chemotaxis                    | 4                                        | 5.882353 | 0.002322 |          |
|            | GO:0007179 | transforming growth factor beta recep    | 4                                        | 5.882353 | 0.005919 |          |
|            | GO:0043542 | endothelial cell migration               | 3                                        | 4.411765 | 0.00594  |          |
|            | GO:0045765 | regulation of angiogenesis               | 3                                        | 4.411765 | 0.006768 |          |
|            | 2          | GO:0045907                               | positive regulation of vasoconstrictor   | 6        | 20.68966 | 1.73E-09 |
|            |            | GO:0008284                               | positive regulation of cell proliferatio | 9        | 31.03448 | 6.32E-07 |
| GO:0008283 |            | cell proliferation                       | 8                                        | 27.58621 | 1.76E-06 |          |
| GO:0007268 |            | chemical synaptic transmission           | 7                                        | 24.13793 | 2.32E-06 |          |
| GO:0007197 |            | adenylate cyclase-inhibiting G-proteir   | 3                                        | 10.34483 | 5.60E-05 |          |
| GO:0007204 |            | positive regulation of cytosolic calciu  | 5                                        | 17.24138 | 6.84E-05 |          |
| GO:0006939 |            | smooth muscle contraction                | 3                                        | 10.34483 | 4.04E-04 |          |
| GO:0007186 |            | G-protein coupled receptor signaling p   | 8                                        | 27.58621 | 5.41E-04 |          |
| GO:0051966 |            | regulation of synaptic transmission, gl  | 3                                        | 10.34483 | 6.64E-04 |          |
| GO:0007611 |            | learning or memory                       | 3                                        | 10.34483 | 0.001631 |          |
| GO:0007271 |            | synaptic transmission, cholinergic       | 3                                        | 10.34483 | 0.001722 |          |

|          |                                                     |   |          |          |
|----------|-----------------------------------------------------|---|----------|----------|
|          | GO:0010745 negative regulation of macrophage de     | 4 | 20       | 3.49E-07 |
|          | GO:0010875 positive regulation of cholesterol efflu | 4 | 20       | 4.44E-07 |
|          | GO:0045861 negative regulation of proteolysis       | 4 | 20       | 1.61E-06 |
| <b>3</b> | GO:0010887 negative regulation of cholesterol stor  | 3 | 15       | 1.81E-05 |
|          | GO:2000188 regulation of cholesterol homeostasis    | 3 | 15       | 4.35E-05 |
|          | GO:0042632 cholesterol homeostasis                  | 4 | 20       | 4.90E-05 |
|          | GO:0042157 lipoprotein metabolic process            | 3 | 15       | 8.32E-04 |
|          | GO:0008203 cholesterol metabolic process            | 3 | 15       | 0.002643 |
|          | GO:0018108 peptidyl-tyrosine phosphorylation        | 7 | 0.163628 | 1.03E-07 |
|          | GO:0042127 regulation of cell proliferation         | 7 | 0.163628 | 3.16E-07 |
| <b>4</b> | GO:0030168 platelet activation                      | 5 | 0.116877 | 2.78E-05 |
|          | GO:0050900 leukocyte migration                      | 4 | 0.093502 | 8.61E-04 |
|          | GO:0045909 positive regulation of vasodilation      | 3 | 0.070126 | 9.12E-04 |
|          | GO:0032229 negative regulation of synaptic transn   | 3 | 12       | 2.93E-05 |
|          | GO:0019433 triglyceride catabolic process           | 3 | 12       | 5.76E-04 |
|          | GO:0060079 excitatory postsynaptic potential        | 3 | 12       | 7.23E-04 |
|          | GO:0042157 lipoprotein metabolic process            | 3 | 12       | 0.001334 |
|          | GO:0001666 response to hypoxia                      | 4 | 16       | 0.001825 |
|          | GO:0001523 retinoid metabolic process               | 3 | 12       | 0.003403 |
|          | GO:0042632 cholesterol homeostasis                  | 3 | 12       | 0.003739 |
|          | GO:0050728 negative regulation of inflammatory r    | 3 | 12       | 0.00564  |
|          | GO:0033004 negative regulation of mast cell activa  | 2 | 8        | 0.005705 |
|          | GO:0007399 nervous system development               | 4 | 16       | 0.007666 |
|          | GO:0010886 positive regulation of cholesterol stor  | 2 | 8        | 0.009964 |
| <b>5</b> | GO:0051001 negative regulation of nitric-oxide syn  | 2 | 8        | 0.011379 |
|          | GO:0051967 negative regulation of synaptic transn   | 2 | 8        | 0.012793 |
|          | GO:0042953 lipoprotein transport                    | 2 | 8        | 0.021234 |
|          | GO:1904707 positive regulation of vascular smooth   | 2 | 8        | 0.021234 |
|          | GO:0030301 cholesterol transport                    | 2 | 8        | 0.022635 |
|          | GO:0010744 positive regulation of macrophage der    | 2 | 8        | 0.022635 |
|          | GO:0042310 vasoconstriction                         | 2 | 8        | 0.024033 |
|          | GO:0048169 regulation of long-term neuronal syna    | 2 | 8        | 0.025429 |
|          | GO:0001935 endothelial cell proliferation           | 2 | 8        | 0.025429 |
|          | GO:0045777 positive regulation of blood pressure    | 2 | 8        | 0.028216 |
|          | GO:0042127 regulation of cell proliferation         | 3 | 12       | 0.028424 |
|          | GO:0033344 cholesterol efflux                       | 2 | 8        | 0.03515  |
|          | GO:0070328 triglyceride homeostasis                 | 2 | 8        | 0.036531 |
| <b>6</b> | GO:0055114 oxidation-reduction process              | 5 | 83.33333 | 7.43E-06 |
| <b>8</b> | GO:0055114 oxidation-reduction process              | 5 | 1        | 1.53E-06 |
|          | GO:0009258 10-formyltetrahydrofolate catabolic p    | 2 | 0.4      | 4.76E-04 |
| <b>9</b> | GO:0055114 oxidation-reduction process              | 6 | 85.71429 | 3.12E-07 |

|                                                           |                                                                     |          |          |          |
|-----------------------------------------------------------|---------------------------------------------------------------------|----------|----------|----------|
| <b>10</b>                                                 | GO:0043065 positive regulation of apoptotic process                 | 5        | 0.270856 | 4.41E-05 |
|                                                           | GO:0002576 platelet degranulation                                   | 4        | 0.216685 | 4.74E-05 |
|                                                           | GO:0043547 positive regulation of GTPase activity                   | 5        | 0.270856 | 5.06E-04 |
|                                                           | GO:0000165 MAPK cascade                                             | 4        | 0.216685 | 7.44E-04 |
|                                                           | GO:0070588 calcium ion transmembrane transport                      | 3        | 0.162514 | 0.003138 |
|                                                           | GO:0043524 negative regulation of neuron apoptotic process          | 3        | 0.162514 | 0.003844 |
|                                                           | GO:0007268 chemical synaptic transmission                           | 3        | 0.162514 | 0.012217 |
|                                                           | GO:0048169 regulation of long-term neuronal synaptic transmission   | 2        | 0.108342 | 0.012792 |
|                                                           | GO:0007597 blood coagulation, intrinsic pathway                     | 2        | 0.108342 | 0.012792 |
|                                                           | GO:2000463 positive regulation of excitatory postsynaptic potential | 2        | 0.108342 | 0.014204 |
|                                                           | GO:0035235 ionotropic glutamate receptor signaling pathway          | 2        | 0.108342 | 0.017022 |
|                                                           | GO:0060079 excitatory postsynaptic potential                        | 2        | 0.108342 | 0.019833 |
|                                                           | GO:0001975 response to amphetamine                                  | 2        | 0.108342 | 0.021937 |
|                                                           | GO:0045429 positive regulation of nitric oxide biosynthetic process | 2        | 0.108342 | 0.03031  |
| <b>11</b>                                                 | GO:0000165 MAPK cascade                                             | 3        | 0.303644 | 0.002351 |
|                                                           | GO:0031293 membrane protein intracellular domain                    | 2        | 0.202429 | 0.005349 |
|                                                           | GO:0043066 negative regulation of apoptotic process                 | 3        | 0.303644 | 0.006939 |
|                                                           | GO:0008284 positive regulation of cell proliferation                | 3        | 0.303644 | 0.007269 |
|                                                           | GO:0001755 neural crest cell migration                              | 2        | 0.202429 | 0.013329 |
|                                                           | GO:0097190 apoptotic signaling pathway                              | 2        | 0.202429 | 0.020965 |
|                                                           | GO:0033209 tumor necrosis factor-mediated signaling pathway         | 2        | 0.202429 | 0.034649 |
| GO:0001934 positive regulation of protein phosphorylation | 2                                                                   | 0.202429 | 0.037252 |          |
| <b>14</b>                                                 | GO:0055114 oxidation-reduction process                              | 3        | 1.456311 | 0.001241 |
|                                                           | GO:0016125 sterol metabolic process                                 | 2        | 0.970874 | 0.0025   |
|                                                           | GO:0006695 cholesterol biosynthetic process                         | 2        | 0.970874 | 0.004521 |

| Genes                                         | Fold Enrichment | Bonferroni  |
|-----------------------------------------------|-----------------|-------------|
| TGFB1, CSF2, STAT3, PIK3CD, NGF, MAPK14, T    | 15.08037719     | 1.43E-10    |
| SRC, STAT3, IGF1, NGF, MT3, MMP9, EGFR, REL   | 10.31182935     | 1.97E-10    |
| IL6, HSP90AA1, IL1B, AKT1, PTGS2, ESR1, TNF,  | 51.68536252     | 8.72E-09    |
| HSP90AA1, NOS3, IL1B, AKT1, CALM3, CALM1,     | 75.98190045     | 1.16E-08    |
| APP, TF, TGFB1, SERPINE1, CALM3, PLG, TIMP    | 26.37235865     | 1.44E-08    |
| IL6, JUN, STAT1, AKT1, IGF1, PTGS2, TNF, FGF2 | 37.04117647     | 1.46E-07    |
| AR, IL6, CD40, TGFB1, PLA2G1B, IL1B, CAT, TL  | 20.42370632     | 1.88E-07    |
| CD40, TGFB1, CXCR4, PIK3CD, PTGS2, TNF, PIK   | 9.773397486     | 3.73E-07    |
| IL6, CD40, PIK3CA, SRC, MAPK1, AKT1, F2, PIK  | 19.3258312      | 2.84E-05    |
| JUN, FLT1, PIK3CA, NOS3, MMP2, SERPINE1, K    | 12.18095489     | 2.87E-05    |
| AKT1, CALM3, APOE, CALM1, ESR1, CALM2         | 67.34759358     | 3.49E-05    |
| PIK3CA, ERBB2, MAPK1, PIK3CD, AKT1, FGF2,     | 25.32730015     | 3.97E-05    |
| CASP9, TGFB1, CASP8, CASP3, STAT3, CAT, PT    | 21.70911441     | 1.17E-04    |
| TGFB1, CREB1, NOS2, CASP3, MMP2, CAT, CXC     | 12.92134063     | 6.46E-04    |
| HSP90AA1, FLT1, PIK3CA, SRC, KDR, MAPK14,     | 24.00816993     | 6.57E-04    |
| IL6, CREB1, STAT3, REL, AKT1, APOE            | 37.04117647     | 8.26E-04    |
| TGFB1, AKT1, MAPK14, FGF2, VEGFA              | 64.98452012     | 0.001379722 |
| JUN, PIK3CA, BDNF, BCL2, APOE, NGF, MT3, B    | 14.96613191     | 0.001494006 |
| FLT1, KDR, AKT1, MAPK14, VEGFA                | 53.68286445     | 0.003111739 |
| JUN, STAT1, BCL2, REL, TIMP1, BCL2L1          | 28.49321267     | 0.003139626 |
| FLT1, NOS3, IL1B, SERPINE1, KDR, FGF2, VEGF   | 15.03120205     | 0.010292488 |
| FLT1, IL1B, MT3, VEGFA                        | 61.73529412     | 0.051377141 |
| CD40, CASP8, TLR9, REL, TNF, RELA, TNFRSF1    | 10.73657289     | 0.067740884 |
| IL1B, TLR9, PTGS2, TNF                        | 47.03641457     | 0.116172164 |
| APP, BCL2, GAPDH, BCL2L1                      | 29.93226381     | 0.387130487 |
| BCL2, AKT1, MT3, BCL2L1                       | 27.4379085      | 0.470220002 |
| APP, AKT1, APOE, PTGS2, EGFR                  | 11.22459893     | 0.791336368 |
| PLA2G1B, IL1B, PIK3CD, PIK3CG                 | 14.96613191     | 0.976300721 |
| JUN, TGFB1, CREB1, SRC                        | 10.73657289     | 0.999929409 |
| PIK3CA, STAT1, NOS3                           | 25.54563895     | 0.999931703 |
| IL6, ERBB2, FGF2                              | 23.89753321     | 0.999982156 |
| PTAFR, ADRA1D, AVP, HTR2A, ADRA1B, ADRA       | 108.5689655     | 1.07E-06    |
| HCK, CHRM1, FLT4, CRH, ADRA1D, AVP, HTR2      | 11.18306941     | 3.92E-04    |
| CHRM3, CHRM1, CDK5, NPY, CHRM5, ADRA1D        | 12.65649143     | 0.001090929 |
| PRKCG, GRM5, CDK5, NPY, CRH, HTR2A, GRM       | 16.88850575     | 0.00143617  |
| CHRM3, CHRM1, CHRM5                           | 248.1576355     | 0.034135276 |
| ADRA1D, FPR2, AVP, ADRA1B, ADRA1A             | 21.60576428     | 0.041532441 |
| CHRM3, HTR2A, ADRA1A                          | 96.50574713     | 0.221378982 |
| CHRM3, CHRM1, PTAFR, ADRA1D, FPR2, ADRA       | 5.152698401     | 0.285183307 |
| GRM5, LRRK2, GRM1                             | 75.52623688     | 0.337480862 |
| PRKCG, CRH, S100B                             | 48.25287356     | 0.636524517 |
| CHRM3, CHRM1, CHRM5                           | 46.94874185     | 0.656587221 |

|                                                     |             |             |
|-----------------------------------------------------|-------------|-------------|
| ABCA1, CETP, NR1H2, NR1H3                           | 258.3384615 | 8.82E-05    |
| ABCA1, LRP1, NR1H2, NR1H3                           | 239.8857143 | 1.12E-04    |
| CSTB, NR1H2, NR1H3, IDE                             | 159.9238095 | 4.08E-04    |
| ABCA1, NR1H2, NR1H3                                 | 419.8       | 0.004580295 |
| NR1H2, NR1H3, SREBF2                                | 279.8666667 | 0.010935573 |
| ABCA1, CETP, NR1H2, NR1H3                           | 52.475      | 0.012317064 |
| ABCA1, CETP, LRP1                                   | 66.28421053 | 0.189939591 |
| ABCA1, CETP, SREBF2                                 | 37.04117647 | 0.488048267 |
| LYN, BCR, IL5, ERBB3, FYN, FGF1, MET                | 28.45412733 | 6.72E-05    |
| JUND, ERBB3, PLAU, LCK, AGTR1, FYN, AGT             | 23.53233233 | 2.07E-04    |
| LYN, SYK, VWF, LCK, FYN                             | 27.04025765 | 0.018003253 |
| LYN, MMP1, LCK, FYN                                 | 20.39101396 | 0.430699945 |
| HMOX1, NOS1, AGT                                    | 64.33716475 | 0.449458741 |
| CNR2, ADORA1, HTR1B                                 | 335.84      | 0.014006428 |
| LPL, APOA1, APOB                                    | 80.6016     | 0.242357018 |
| PPP3CA, ADORA1, SNCA                                | 71.96571429 | 0.294476898 |
| LPL, APOA1, APOB                                    | 53.02736842 | 0.474437682 |
| F7, PRKCB, ADORA1, HSP90B1                          | 15.62046512 | 0.585320852 |
| LPL, APOA1, APOB                                    | 33.03344262 | 0.806608637 |
| LPL, APOA1, APOB                                    | 31.485      | 0.835627575 |
| CNR2, PRKCD, APOA1                                  | 25.50683544 | 0.934539495 |
| CNR2, CNR1                                          | 335.84      | 0.936569822 |
| CHRM2, GAL, ADORA1, APOB                            | 9.361393728 | 0.975509457 |
| LPL, APOB                                           | 191.9085714 | 0.991986348 |
| CNR2, CNR1                                          | 167.92      | 0.995979258 |
| ADORA1, HTR1B                                       | 149.2622222 | 0.997982729 |
| PRKCB, APOB                                         | 89.55733333 | 0.999967853 |
| ERN1, HTR1B                                         | 89.55733333 | 0.999967853 |
| APOA1, APOB                                         | 83.96       | 0.999983876 |
| LPL, APOB                                           | 83.96       | 0.999983876 |
| HTR1A, HTR1B                                        | 79.02117647 | 0.999991913 |
| SYP, SNCA                                           | 74.63111111 | 0.999995944 |
| ERN1, APOA1                                         | 74.63111111 | 0.999995944 |
| CNR1, ADORA1                                        | 67.168      | 0.99999898  |
| BLK, FGR, YES1                                      | 10.89210811 | 0.99999908  |
| APOA1, APOB                                         | 53.7344     | 0.99999968  |
| LPL, APOA1                                          | 51.66769231 | 0.999999984 |
| CBR1, ALDH1A3, ALDH1A2, CRYZ, CBR3                  | 23.63738739 | 4.46E-04    |
| ALDH1L1, AKR1B10, AKR1B15, AKR1A1, ALDH1L1, ALDH1L2 | 28.36486486 | 2.91E-05    |
| ALDH1L1, ALDH1L2                                    | 3358.4      | 0.00901242  |
| RDH8, MAOA, ALDH1A1, AKR1B1, AOX1, HSD1             | 24.31274131 | 1.28E-05    |

|                                  |             |             |
|----------------------------------|-------------|-------------|
| TOP2A, GRIN2A, PSEN1, CLU, GRIN1 | 21.52820513 | 0.012807144 |
| SERPINA3, APOH, A2M, CLU         | 50.16280807 | 0.013736079 |
| GRIN2A, DLG4, A2M, FGFR3, GRIN1  | 11.43090538 | 0.1373865   |
| GRIN2A, DLG4, FGFR3, GRIN1       | 19.72049325 | 0.195408518 |
| GRIN2A, PSEN1, GRIN1             | 32.56367162 | 0.60055057  |
| HSP90AB1, PSEN1, GRIN1           | 29.35664336 | 0.675231951 |
| GRIN2A, DLG4, GRIN1              | 16.14615385 | 0.972380656 |
| DLG4, GRIN1                      | 143.5213675 | 0.976700445 |
| APOH, A2M                        | 143.5213675 | 0.976700445 |
| DLG4, GRIN1                      | 129.1692308 | 0.984659708 |
| GRIN2A, GRIN1                    | 107.6410256 | 0.99335124  |
| GRIN2A, GRIN1                    | 92.26373626 | 0.997118882 |
| GRIN2A, GRIN1                    | 83.33498759 | 0.998461422 |
| HSP90AB1, CLU                    | 60.07871199 | 0.999875013 |
| MAPK11, GDNF, ERBB4              | 32.04580153 | 0.313815614 |
| NGFR, ADAM17                     | 310.962963  | 0.57603884  |
| NGFR, GDNF, ERBB4                | 18.45274725 | 0.671790067 |
| ADAM17, GDNF, ERBB4              | 18.01716738 | 0.688801696 |
| GDNF, ERBB4                      | 124.3851852 | 0.883167254 |
| NGFR, PRKCA                      | 78.83568075 | 0.966296011 |
| NGFR, ADAM17                     | 47.43502825 | 0.996455097 |
| ADAM17, ERBB4                    | 44.07349081 | 0.997698566 |
| CYP51A1, CYP46A1, LBR            | 28.36486486 | 0.013565319 |
| CYP51A1, CYP46A1                 | 533.0793651 | 0.027155612 |
| CYP51A1, LBR                     | 294.5964912 | 0.048621711 |
