# Supplementary material for: Exploring the Oxidative Stress Mechanism of Buyang Huanwu Decoction in Intervention of Vascular Dementia Based on Systems Biology Strategy
Source: Hindawi journal article supplement (doi:10.1155/2021/8879060), 2021-01-01
Supplement: f6 [file 8879060.f6.pdf]

**Table S4 Signaling Pathway of MBHD-VD PPI Network**

| <b>Term</b> | <b>Pathway</b>                       | <b>Count</b> | <b>%</b> | <b>Pvalue</b> |
|-------------|--------------------------------------|--------------|----------|---------------|
| hsa04024    | cAMP signaling pathway               | 42           | 0.052775 | 1.3E-13       |
| hsa04066    | HIF-1 signaling pathway              | 28           | 0.035183 | 1.16E-12      |
| hsa04210    | Apoptosis                            | 22           | 0.027644 | 7.63E-12      |
| hsa04722    | Neurotrophin signaling pathway       | 29           | 0.03644  | 6.11E-11      |
| hsa04370    | VEGF signaling pathway               | 20           | 0.025131 | 4.05E-10      |
| hsa04012    | ErbB signaling pathway               | 21           | 0.026388 | 4.69E-08      |
| hsa04010    | MAPK signaling pathway               | 38           | 0.047749 | 6.12E-08      |
| hsa04620    | Toll-like receptor signaling pathway | 23           | 0.028901 | 7.15E-08      |
| hsa04151    | PI3K-Akt signaling pathway           | 43           | 0.054032 | 1.37E-06      |
| hsa04150    | mTOR signaling pathway               | 13           | 0.016335 | 7.32E-05      |
| hsa04064    | NF-kappa B signaling pathway         | 16           | 0.020105 | 8.89E-05      |
| hsa04115    | p53 signaling pathway                | 10           | 0.012565 | 0.012304      |
| hsa04330    | Notch signaling pathway              | 8            | 0.010052 | 0.017089      |
| hsa04310    | Wnt signaling pathway                | 13           | 0.016335 | 0.088603      |

| <b>Genes</b>                                       | <b>Fold Enrichment</b> | <b>Bonferroni</b> |
|----------------------------------------------------|------------------------|-------------------|
| PPARA, ATP1B1, ADORA2A, GLI3, ADORA1, GLI1, AKT    | 3.751110072            | 3.14838E-11       |
| TF, ERBB2, TIMP1, AKT1, BCL2, HMOX1, SERPINE1, PII | 5.15777635             | 2.82491E-10       |
| PIK3CG, TNF, RELA, CYCS, PIK3CD, BCL2L1, CAPN2, C  | 6.274898416            | 1.85404E-09       |
| AKT1, BDNF, BCL2, PIK3CA, CALML5, AKT3, AKT2, PII  | 4.273586118            | 1.48593E-08       |
| PRKCA, PIK3CG, PTGS2, PIK3CD, PRKCG, MAPK11, SR    | 5.79796873             | 9.83612E-08       |
| PRKCA, EGFR, PIK3CG, ERBB4, ERBB3, ERBB2, PIK3C    | 4.268504565            | 1.14006E-05       |
| FGFR2, FGFR1, FGFR4, FGFR3, TNF, TGFB1, AKT1, TNF  | 2.656065517            | 1.48634E-05       |
| PIK3CG, IL6, TNF, TBK1, RELA, PIK3CD, MAPK11, MAP  | 3.837051947            | 1.73768E-05       |
| HSP90AB1, FGFR2, FGFR1, FGFR4, FGFR3, MCL1, BCL2   | 2.204068403            | 0.00033359        |
| PRKCA, PIK3CG, AKT1, MAPK1, TNF, PIK3CD, MAPK3,    | 3.963611382            | 0.017634492       |
| ICAM1, TNF, LYN, PTGS2, RELA, TNFSF14, CD40, BCL2  | 3.252193954            | 0.021376492       |
| CDK1, CASP3, CASP9, CYCS, CASP8, SERPINE1, IGF1, A | 2.639373825            | 0.950635937       |
| NCSTN, NOTCH3, APH1A, PSEN1, PSEN2, APH1B, ADA     | 2.947300771            | 0.984832357       |
| PRKCA, PPARD, DKK1, PSEN1, JUN, GSK3B, MAPK9, PI   | 1.665865653            | 1                 |
