# Supplementary material for: Exploring the Oxidative Stress Mechanism of Buyang Huanwu Decoction in Intervention of Vascular Dementia Based on Systems Biology Strategy
Source: Hindawi journal article supplement (doi:10.1155/2021/8879060), 2021-01-01
Supplement: f7 [file 8879060.f7.pdf]

**Table S5 Enrichment analysis of Differentially Expressed protein PPI Network**

| Category                  | Term                     | Pathway                                  | Count                     | %        | Pvalue   |
|---------------------------|--------------------------|------------------------------------------|---------------------------|----------|----------|
| <b>biological process</b> | GO:0002526               | acute inflammatory response              | 4                         | 0.087051 | 1.05E-05 |
|                           | GO:0006915               | apoptotic process                        | 7                         | 0.152339 | 5.46E-05 |
|                           | GO:0035234               | ectopic germ cell programmed cell de     | 3                         | 0.065288 | 9.55E-05 |
|                           | GO:0032496               | response to lipopolysaccharide           | 6                         | 0.130577 | 1.65E-04 |
|                           | GO:0043065               | positive regulation of apoptotic proces  | 6                         | 0.130577 | 3.93E-04 |
|                           | GO:0071407               | cellular response to organic cyclic cor  | 4                         | 0.087051 | 0.001539 |
|                           | GO:0097192               | extrinsic apoptotic signaling pathway    | 3                         | 0.065288 | 0.001966 |
|                           | GO:0045944               | positive regulation of transcription frc | 8                         | 0.174102 | 0.002542 |
|                           | GO:0071310               | cellular response to organic substance   | 3                         | 0.065288 | 0.00269  |
|                           | GO:0045429               | positive regulation of nitric oxide bios | 3                         | 0.065288 | 0.003232 |
|                           | GO:0010332               | response to gamma radiation              | 3                         | 0.065288 | 0.003375 |
|                           | GO:0032755               | positive regulation of interleukin-6 pr  | 3                         | 0.065288 | 0.003976 |
|                           | GO:0045893               | positive regulation of transcription, D  | 6                         | 0.130577 | 0.004013 |
|                           | GO:0008285               | negative regulation of cell proliferatio | 5                         | 0.108814 | 0.005112 |
|                           | GO:0009408               | response to heat                         | 3                         | 0.065288 | 0.009433 |
|                           | GO:0070301               | cellular response to hydrogen peroxid    | 3                         | 0.065288 | 0.009903 |
|                           | GO:0001660               | fever generation                         | 2                         | 0.043526 | 0.01124  |
|                           | GO:0001666               | response to hypoxia                      | 4                         | 0.087051 | 0.01401  |
|                           | GO:0032308               | positive regulation of prostaglandin se  | 2                         | 0.043526 | 0.016814 |
|                           | <b>signaling pathway</b> | rno05332                                 | Graft-versus-host disease | 5        | 0.108814 |
| rno05020                  |                          | Prion diseases                           | 4                         | 0.087051 | 6.51E-05 |
| rno05321                  |                          | Inflammatory bowel disease (IBD)         | 4                         | 0.087051 | 4.96E-04 |
| rno05140                  |                          | Leishmaniasis                            | 4                         | 0.087051 | 6.70E-04 |
| rno05164                  |                          | Influenza A                              | 5                         | 0.108814 | 6.85E-04 |
| rno04940                  |                          | Type I diabetes mellitus                 | 4                         | 0.087051 | 7.85E-04 |
| rno05152                  |                          | Tuberculosis                             | 5                         | 0.108814 | 8.66E-04 |
| rno04640                  |                          | Hematopoietic cell lineage               | 4                         | 0.087051 | 9.79E-04 |
| rno05323                  |                          | Rheumatoid arthritis                     | 4                         | 0.087051 | 0.001283 |
| rno04932                  |                          | Non-alcoholic fatty liver disease (NA)   | 4                         | 0.087051 | 0.006795 |
| rno04623                  |                          | Cytosolic DNA-sensing pathway            | 3                         | 0.065288 | 0.008107 |
| rno05134                  |                          | Legionellosis                            | 3                         | 0.065288 | 0.00839  |
| rno04621                  |                          | NOD-like receptor signaling pathway      | 3                         | 0.065288 | 0.00839  |
| rno05133                  |                          | Pertussis                                | 3                         | 0.065288 | 0.013496 |
| rno05168                  |                          | Herpes simplex infection                 | 4                         | 0.087051 | 0.014884 |
| rno05132                  |                          | Salmonella infection                     | 3                         | 0.065288 | 0.017224 |
| rno04620                  |                          | Toll-like receptor signaling pathway     | 3                         | 0.065288 | 0.023092 |
| rno04010                  |                          | MAPK signaling pathway                   | 4                         | 0.087051 | 0.023582 |

| <b>Genes</b>                                      | <b>Fold Enrichment</b> | <b>Bonferroni</b> |
|---------------------------------------------------|------------------------|-------------------|
| IL6, IL1B, DEFB1, IL1A                            | 89.69309463            | 0.006873571       |
| DLC1, PLEKHF1, PRF1, BAX, SIX1, NR4A1, DDIT4      | 9.863789778            | 0.035271767       |
| BAX, IL1B, IL1A                                   | 193.4007353            | 0.060902632       |
| IL6, DIO2, IL1B, NFKBIA, IL1A, TRIB1              | 11.05147059            | 0.10278324        |
| IL6, DUSP1, BAX, IL1B, NR4A1, SIRT1               | 9.155064393            | 0.228110794       |
| IL1B, NFKBIA, KLF2, SIRT1                         | 16.90935391            | 0.637129049       |
| BAX, IL1B, IL1A                                   | 44.20588235            | 0.726022724       |
| IL6, SIX1, IL1B, NFKBIA, NR4A1, KLF2, SIRT1, IL1A | 4.029181985            | 0.812662613       |
| BAX, IL1B, NR4A1                                  | 37.73672884            | 0.830077759       |
| IL6, IL1B, KLF2                                   | 34.38235294            | 0.881212248       |
| BAX, IL1B, IL1A                                   | 33.63491049            | 0.89191099        |
| IL6, IL1B, IL1A                                   | 30.94411765            | 0.927318904       |
| IL6, SIX1, IL1B, NFKBIA, NR4A1, KLF2              | 5.419285052            | 0.929076586       |
| DLC1, IL6, BAX, IL1B, IL1A                        | 6.894856873            | 0.965690565       |
| IL6, IL1B, IL1A                                   | 19.83597285            | 0.998043325       |
| IL6, KLF2, SIRT1                                  | 19.34007353            | 0.998568133       |
| IL1B, IL1A                                        | 171.9117647            | 0.999411154       |
| APOLD1, IL1B, IL1A, DDIT4                         | 7.640522876            | 0.999907076       |
| IL1B, IL1A                                        | 114.6078431            | 0.999985739       |
| PRF1, IL6, IL1B, IL1A, RT1-DA                     | 29.35227273            | 0.00146931        |
| IL6, BAX, IL1B, IL1A                              | 46.96363636            | 0.005647876       |
| IL6, IL1B, IL1A, RT1-DA                           | 23.84307692            | 0.042240931       |
| IL1B, NFKBIA, IL1A, RT1-DA                        | 21.525                 | 0.056630993       |
| IL6, IL1B, NFKBIA, IL1A, RT1-DA                   | 11.32894737            | 0.057853199       |
| PRF1, IL1B, IL1A, RT1-DA                          | 20.39210526            | 0.066016973       |
| IL6, BAX, IL1B, IL1A, RT1-DA                      | 10.64423077            | 0.072570867       |
| IL6, IL1B, IL1A, RT1-DA                           | 18.9                   | 0.081716016       |
| IL6, IL1B, IL1A, RT1-DA                           | 17.22                  | 0.105696944       |
| IL6, BAX, IL1B, IL1A                              | 9.566666667            | 0.447434073       |
| IL6, IL1B, NFKBIA                                 | 20.75625               | 0.507460522       |
| IL6, IL1B, NFKBIA                                 | 20.39210526            | 0.519519413       |
| IL6, IL1B, NFKBIA                                 | 20.39210526            | 0.519519413       |
| IL6, IL1B, IL1A                                   | 15.92260274            | 0.693388448       |
| IL6, IL1B, NFKBIA, RT1-DA                         | 7.175                  | 0.728730719       |
| IL6, IL1B, IL1A                                   | 14.00421687            | 0.779432849       |
| IL6, IL1B, NFKBIA                                 | 11.98298969            | 0.868998469       |
| DUSP1, IL1B, NR4A1, IL1A                          | 6.030350195            | 0.874592625       |
